# Supplementary material for: The glioblastoma multiforme tumor site promotes the commitment of tumor-infiltrating lymphocytes to the TH17 lineage in humans
Source: PubMed Central journal article supplement — Proc Natl Acad Sci U S A. 2022 Aug 15;119(34):e2206208119. doi: 10.1073/pnas.2206208119 (PMC9407554; doi:10.1073/pnas.2206208119), 2022-08-15
Supplement: pnas.2206208119.sapp.pdf [file pnas.2206208119.sapp.pdf]

## Supporting Information for

### **The glioblastoma multiforme tumor site promotes the commitment of tumor infiltrating lymphocytes to the T<sub>H</sub>17 lineage in humans**

Meike Mitsdoerffer, Lilian Aly, Melanie Barz, Thomas Engleitner, Christopher Sie, Claire Delbridge, Gildas Lepennetier, Rupert Öllinger, Monika Pfaller, Benedikt Wiestler, Roland Rad, Bernhard Meyer, Benjamin Knier, Friederike Schmidt-Graf, Jens Gempt, Thomas Korn

Corresponding author: Thomas Korn  
Email: [thomas.korn@tum.de](mailto:thomas.korn@tum.de)

#### **This PDF file includes:**

Figures S1 to S3  
Tables S1 and S2  
Legends for Datasets S1 and S2

#### **Other supporting materials for this manuscript include the following:**

Datasets S1 and S2 (xlsx files)

# Supplementary Figure 1

|                                                                                               | SIZE | NES (N vs B) | NOM p-val | NES (T vs B) | NOM p-val | NES (T vs N) | NOM p-val |
|-----------------------------------------------------------------------------------------------|------|--------------|-----------|--------------|-----------|--------------|-----------|
| <b>TH1 SIGNATURE SETS</b>                                                                     |      |              |           |              |           |              |           |
| TAG+TH1_GSE43863_TH1_VS_LY6C_INT_CXCR5POS_EFFECTOR_CD4_TCELL_UP                               | 197  | 1.458        | 0.04848   | 1.854        | 0.00805   | 1.732        | 0.01768   |
| TAG+TH1_GSE2770_IL12_VS_IL4_TREATED_ACT_CD4_TCELL_48H_UP                                      | 199  | 1.320        | 0.04102   | 1.675        | 0.00000   | 1.671        | 0.00406   |
| TAG+TH1_GSE2770_UNTREATED_VS_TGFB_AND_IL12_TREATED_ACT_CD4_TCELL_2H_DN                        | 196  | 1.521        | 0.00407   | 1.893        | 0.00000   | 1.618        | 0.00000   |
| TAG+TH1_GSE43863_TH1_VS_LY6C_LOW_CXCR5NEG_EFFECTOR_CD4_TCELL_UP                               | 200  | 1.520        | 0.01961   | 1.878        | 0.00406   | 1.601        | 0.02049   |
| TAG+TH1_GSE2770_IL12_ACT_VS_ACT_CD4_TCELL_6H_UP                                               | 190  | 1.352        | 0.03922   | 1.688        | 0.00202   | 1.570        | 0.00203   |
| TAG+TH1_GSE2770_TGFB_AND_IL4_VS_IL12_TREATED_ACT_CD4_TCELL_2H_DN                              | 196  | 1.916        | 0.00000   | 2.044        | 0.00000   | 1.537        | 0.04867   |
| TAG+TH1_GSE2770_IL12_AND_TGFB_VS_IL4_TREATED_ACT_CD4_TCELL_2H_UP                              | 196  | 1.511        | 0.01394   | 1.704        | 0.00410   | 1.508        | 0.01978   |
| TAG+TH1_GSE2770_IL12_AND_TGFB_VS_IL4_TREATED_ACT_CD4_TCELL_6H_UP                              | 200  | 1.266        | 0.03633   | 1.739        | 0.00000   | 1.492        | 0.01556   |
| TAG+TH1_GSE2770_IL12_ACT_VS_ACT_CD4_TCELL_2H_UP                                               | 192  | 1.291        | 0.05871   | 1.687        | 0.00203   | 1.474        | 0.00813   |
| TAG+TH1_GSE2770_UNTREATED_VS_IL12_TREATED_ACT_CD4_TCELL_2H_DN                                 | 200  | 1.689        | 0.00000   | 1.936        | 0.00000   | 1.454        | 0.00194   |
| TAG+TH1_GSE2770_TGFB_AND_IL4_VS_TGFB_AND_IL12_TREATED_ACT_CD4_TCELL_2H_DN                     | 194  | 1.443        | 0.01538   | 1.759        | 0.00000   | 1.453        | 0.00885   |
| TAG+TH1_GSE14308_TH1_VS_NAIVE_CD4_TCELL_UP                                                    | 198  | 1.307        | 0.06092   | 1.730        | 0.00000   | 1.433        | 0.00840   |
| TAG+TH1_GSE2770_IL12_AND_TGFB_ACT_VS_ACT_CD4_TCELL_2H_UP                                      | 195  | 1.626        | 0.00193   | 1.903        | 0.00000   | 1.413        | 0.03194   |
| TAG+TH1_GSE46242_TH1_VS_ANERGIC_TH1_CD4_TCELL_WITH_EGR2_DELETED_UP                            | 197  | 1.668        | 0.00000   | 1.854        | 0.00000   | 1.405        | 0.03704   |
| TAG+TH1_GSE2770_TGFB_AND_IL4_VS_IL12_TREATED_ACT_CD4_TCELL_48H_DN                             | 197  | 1.552        | 0.02209   | 1.808        | 0.00000   | 1.389        | 0.07692   |
| TAG+TH1_GSE32901_NAIVE_VS_TH1_CD4_TCELL_DN                                                    | 164  | 1.672        | 0.00204   | 1.840        | 0.00000   | 1.304        | 0.06904   |
| TAG+TH1_GSE2770_IL12_AND_TGFB_ACT_VS_ACT_CD4_TCELL_48H_UP                                     | 195  | 1.356        | 0.01000   | 1.597        | 0.00411   | 1.302        | 0.02000   |
| TAG+TH1_GSE2770_IL12_AND_TGFB_VS_IL4_TREATED_ACT_CD4_TCELL_48H_UP                             | 196  | 1.258        | 0.06110   | 1.512        | 0.00598   | 1.298        | 0.01224   |
| TAG+TH1_GSE2770_UNTREATED_VS_IL12_TREATED_ACT_CD4_TCELL_48H_DN                                | 199  | 1.102        | 0.25794   | 1.559        | 0.00584   | 1.294        | 0.06432   |
| TAG+TH1_GSE43863_NAIVE_VS_LY6C_LOW_CXCR5NEG_CD4_EFF_TCELL_D6_LCMV_DN                          | 192  | 1.295        | 0.03571   | 1.542        | 0.00000   | 1.272        | 0.04356   |
| TAG+TH1_GSE43863_TH1_VS_LY6C_INT_CXCR5POS_MEMORY_CD4_TCELL_UP                                 | 198  | -1.007       | 0.44231   | 1.273        | 0.04280   | 1.257        | 0.08316   |
| TAG+TH1_GSE2770_IL12_VS_TGFB_AND_IL12_TREATED_ACT_CD4_TCELL_48H_UP                            | 198  | 1.500        | 0.01167   | 1.623        | 0.00593   | 1.229        | 0.11181   |
| TAG+TH1_GSE43863_DAY6_EFF_VS_DAY150_MEM_TH1_CD4_TCELL_DN                                      | 197  | 1.203        | 0.15830   | 1.584        | 0.00591   | 1.201        | 0.16090   |
| TAG+TH1_GSE2770_IL12_VS_IL4_TREATED_ACT_CD4_TCELL_6H_UP                                       | 198  | 1.010        | 0.44071   | 1.473        | 0.00000   | 1.184        | 0.07872   |
| TAG+TH1_GSE2770_IL12_ACT_VS_ACT_CD4_TCELL_48H_UP                                              | 199  | 1.423        | 0.02953   | 1.563        | 0.01198   | 1.166        | 0.15368   |
| TAG+TH1_GSE2770_IL12_VS_IL4_TREATED_ACT_CD4_TCELL_2H_UP                                       | 145  | -1.191       | 0.11530   | 1.209        | 0.08745   | 1.158        | 0.14619   |
| TAG+TH1_GSE2770_IL12_VS_TGFB_AND_IL12_TREATED_ACT_CD4_TCELL_6H_UP                             | 193  | 1.063        | 0.28986   | 1.275        | 0.02101   | 1.030        | 0.36653   |
| <b>TH2 SIGNATURE SETS</b>                                                                     |      |              |           |              |           |              |           |
| TAG+TH2_GSE2770_IL12_AND_TGFB_VS_IL4_TREATED_ACT_CD4_TCELL_48H_DN                             | 191  | 1.199        | 0.14907   | 1.798        | 0.00000   | 1.693        | 0.00417   |
| TAG+TH2_GSE2770_IL4_ACT_VS_ACT_CD4_TCELL_2H_UP                                                | 198  | 1.547        | 0.01025   | 1.833        | 0.00000   | 1.606        | 0.00204   |
| TAG+TH2_GSE2770_UNTREATED_VS_IL4_TREATED_ACT_CD4_TCELL_6H_DN                                  | 197  | 0.931        | 0.61602   | 1.583        | 0.00196   | 1.599        | 0.00000   |
| TAG+TH2_GSE2770_UNTREATED_VS_IL4_TREATED_ACT_CD4_TCELL_48H_DN                                 | 197  | 1.347        | 0.04808   | 1.726        | 0.00604   | 1.597        | 0.01004   |
| TAG+TH2_GSE2770_TGFB_AND_IL4_VS_IL4_TREATED_ACT_CD4_TCELL_6H_DN                               | 197  | 1.351        | 0.08481   | 1.689        | 0.00593   | 1.575        | 0.00000   |
| TAG+TH2_GSE14308_TH2_VS_NAIVE_CD4_TCELL_UP                                                    | 194  | 1.329        | 0.00202   | 1.524        | 0.00596   | 1.390        | 0.01720   |
| TAG+TH2_GSE2770_IL4_ACT_VS_ACT_CD4_TCELL_48H_UP                                               | 198  | 1.022        | 0.42520   | 1.354        | 0.00794   | 1.321        | 0.01271   |
| TAG+TH2_BOSCO_ALLERGEN_INDUCED_TH2_ASSOCIATED_MODULE                                          | 148  | 1.325        | 0.10000   | 1.598        | 0.01807   | 1.181        | 0.20851   |
| <b>TH17 SIGNATURE SETS</b>                                                                    |      |              |           |              |           |              |           |
| TAG+TH17_GSE27241_WT_VS_RORGT_KO_TH17_POLARIZED_CD4_TCELL_UP                                  | 158  | 1.502        | 0.02196   | 2.024        | 0.00200   | 1.929        | 0.00405   |
| TAG+TH17_GSE27241_CTRL_VS_DIGOXIN_TREATED_RORGT_KO_CD4_TCELL_IN_TH17_POLARIZING_CONDITIONS_UP | 193  | 1.103        | 0.24056   | 1.669        | 0.00401   | 1.687        | 0.00000   |
| TAG+TH17_GSE43955_1H_VS_60H_ACT_CD4_TCELL_WITH_TGFB_IL6_UP                                    | 193  | 1.569        | 0.00977   | 1.879        | 0.00000   | 1.583        | 0.00217   |
| TAG+TH17_GSE21670_IL6_VS_TGFB_AND_IL6_TREATED_STAT3_KO_CD4_TCELL_UP                           | 200  | 1.172        | 0.15048   | 1.885        | 0.00000   | 1.487        | 0.01212   |
| TAG+TH17_GSE14308_TH17_VS_NAIVE_CD4_TCELL_UP                                                  | 197  | 1.112        | 0.20117   | 1.537        | 0.00000   | 1.474        | 0.00593   |
| TAG+TH17_GSE43955_1H_VS_10H_ACT_CD4_TCELL_WITH_TGFB_IL6_UP                                    | 195  | 1.410        | 0.01822   | 1.806        | 0.00000   | 1.439        | 0.01217   |
| TAG+TH17_GSE43955_TH0_VS_TGFB_IL6_IL23_TH17_ACT_CD4_TCELL_60H_DN                              | 194  | 1.520        | 0.00190   | 1.826        | 0.00000   | 1.432        | 0.01099   |
| TAG+TH17_GSE43955_TH0_VS_TGFB_IL6_IL23_TH17_ACT_CD4_TCELL_52H_DN                              | 198  | 1.737        | 0.00000   | 1.812        | 0.00000   | 1.409        | 0.01636   |
| TAG+TH17_GSE21670_STAT3_KO_VS_WT_CD4_TCELL_DN                                                 | 198  | -1.033       | 0.40833   | 1.207        | 0.19010   | 1.388        | 0.05870   |
| TAG+TH17_GSE43955_1H_VS_20H_ACT_CD4_TCELL_WITH_TGFB_IL6_UP                                    | 197  | 1.299        | 0.03520   | 1.604        | 0.00000   | 1.323        | 0.02070   |
| TAG+TH17_GSE14308_TH17_VS_NATURAL_TREG_UP                                                     | 198  | 0.993        | 0.48185   | 1.538        | 0.00388   | 1.254        | 0.05714   |
| TAG+TH17_GSE43955_10H_VS_30H_ACT_CD4_TCELL_WITH_TGFB_IL6_DN                                   | 198  | 1.543        | 0.00000   | 1.642        | 0.00198   | 1.243        | 0.06388   |
| TAG+TH17_GSE43955_1H_VS_42H_ACT_CD4_TCELL_WITH_TGFB_IL6_UP                                    | 193  | 1.489        | 0.00407   | 1.696        | 0.00000   | 1.181        | 0.13665   |
| TAG+TH17_GSE43955_TH0_VS_TGFB_IL6_TH17_ACT_CD4_TCELL_60H_DN                                   | 197  | 1.395        | 0.01341   | 1.674        | 0.00000   | 1.163        | 0.13449   |
| TAG+TH17_GSE43955_TH0_VS_TGFB_IL6_TH17_ACT_CD4_TCELL_52H_DN                                   | 194  | 1.576        | 0.00201   | 1.753        | 0.00000   | 1.156        | 0.11728   |
| TAG+TH17_GSE43955_1H_VS_42H_ACT_CD4_TCELL_WITH_TGFB_IL6_DN                                    | 198  | 1.451        | 0.00396   | 1.754        | 0.00000   | 1.123        | 0.20582   |
| <b>TREG SIGNATURE SETS</b>                                                                    |      |              |           |              |           |              |           |
| TAG+TREG_GSE24634_NAIVE_CD4_TCELL_VS_DAY10_IL4_CONV_TREG_DN                                   | 200  | 1.911        | 0.00000   | 2.156        | 0.00000   | 2.099        | 0.00207   |
| TAG+TREG_GSE24634_NAIVE_CD4_TCELL_VS_DAY7_IL4_CONV_TREG_DN                                    | 198  | 1.764        | 0.00000   | 2.145        | 0.00000   | 2.066        | 0.00210   |
| TAG+TREG_GSE24634_TREG_VS_TCONV_POST_DAY7_IL4_CONVERSION_UP                                   | 196  | 1.839        | 0.00000   | 2.042        | 0.00000   | 1.902        | 0.00000   |
| TAG+TREG_GSE24634_NAIVE_CD4_TCELL_VS_DAY3_IL4_CONV_TREG_DN                                    | 199  | 1.711        | 0.00000   | 1.951        | 0.00000   | 1.821        | 0.00207   |
| TAG+TREG_GSE24634_TREG_VS_TCONV_POST_DAY10_IL4_CONVERSION_UP                                  | 199  | 1.678        | 0.00205   | 1.956        | 0.00204   | 1.817        | 0.00000   |
| TAG+TREG_GSE24634_NAIVE_CD4_TCELL_VS_DAY5_IL4_CONV_TREG_DN                                    | 198  | 1.550        | 0.02574   | 1.896        | 0.00214   | 1.647        | 0.01062   |
| TAG+TREG_GSE24634_TREG_VS_TCONV_POST_DAY3_IL4_CONVERSION_UP                                   | 199  | 1.164        | 0.21386   | 1.791        | 0.00412   | 1.624        | 0.01381   |
| TAG+TREG_GSE14350_IL2RB_KO_VS_WT_TREG_DN                                                      | 199  | 1.640        | 0.00000   | 1.801        | 0.00000   | 1.480        | 0.00424   |
| TAG+TREG_GSE15659_NAIVE_CD4_TCELL_VS_ACTIVATED_TREG_DN                                        | 193  | 1.396        | 0.00994   | 1.814        | 0.00000   | 1.432        | 0.01092   |
| TAG+TREG_GSE15659_CD45RA_NEG_CD4_TCELL_VS_ACTIVATED_TREG_DN                                   | 193  | -1.016       | 0.44512   | 1.348        | 0.02140   | 1.376        | 0.02893   |
| TAG+TREG_GSE15659_CD45RA_NEG_CD4_TCELL_VS_RESTING_TREG_DN                                     | 190  | -0.971       | 0.47166   | -1.475       | 0.01619   | -1.405       | 0.03080   |
| <b>TFH SIGNATURE SETS</b>                                                                     |      |              |           |              |           |              |           |
| TAG+TFH_GSE43863_TFH_VS_LY6C_INT_CXCR5POS_MEMORY_CD4_TCELL_UP                                 | 196  | 1.560        | 0.00795   | 1.881        | 0.00000   | 1.500        | 0.03542   |
| TAG+TFH_GSE43863_DAY6_EFF_VS_DAY150_MEM_TFH_CD4_TCELL_DN                                      | 195  | 1.633        | 0.00000   | 1.814        | 0.00000   | 1.384        | 0.01037   |
| TAG+TFH_GSE43863_TFH_VS_LY6C_LOW_CXCR5NEG_EFFECTOR_CD4_TCELL_UP                               | 199  | 1.282        | 0.09478   | 1.578        | 0.01025   | 1.366        | 0.07261   |
| TAG+TFH_GSE43863_TH1_VS_TFH_MEMORY_CD4_TCELL_DN                                               | 200  | 1.461        | 0.00986   | 1.732        | 0.00000   | 1.360        | 0.01414   |
| TAG+TFH_GSE43863_TH1_VS_LY6C_LOW_CXCR5NEG_EFFECTOR_CD4_TCELL_DN                               | 198  | 1.471        | 0.00189   | 1.598        | 0.00000   | 1.251        | 0.05051   |
| TAG+TFH_GSE21380_TFH_VS_GERMINAL_CENTER_TFH_CD4_TCELL_DN                                      | 196  | 1.080        | 0.23946   | 1.331        | 0.02231   | 1.218        | 0.09072   |
| TAG+TFH_GSE21380_NON_TFH_VS_TFH_CD4_TCELL_DN                                                  | 196  | 1.113        | 0.25253   | 1.368        | 0.03383   | 1.148        | 0.17647   |
| TAG+TFH_GSE21380_NON_TFH_VS_GERMINAL_CENTER_TFH_CD4_TCELL_DN                                  | 199  | 0.803        | 0.77515   | 1.007        | 0.46654   | 1.067        | 0.30123   |

## Supplementary Figure 1 | Gene signatures tested for CD4<sup>+</sup> TILs.

Canonical T cell signatures ( $T_H1$ ,  $T_H2$ ,  $T_H17$ ,  $T_{FH}$ , and  $T_{REG}$ ) tested for enrichment in CD4<sup>+</sup> T cells isolated from normal appearing brain (N) vs blood (B), tumor (T) vs blood (B), and tumor (T) vs normal appearing brain (N). Gene set enrichment analysis (1).

## Supplementary Figure 2

| TEFF SIGNATURE SETS                                                      |     | SIZE   | NES (N vs B) | NOM p-val | NES (T vs B) | NOM p-val | NES (T vs N) | NOM p-val |
|--------------------------------------------------------------------------|-----|--------|--------------|-----------|--------------|-----------|--------------|-----------|
| TAG+TEFF_GSE15750_DAY6_VS_DAY10_EFF_CD8_TCELL_UP                         | 199 | 1.298  | 0.14342      | 2.110     | 0.00000      | 2.111     | 0.00000      |           |
| TAG+TEFF_KAECH_NAIVE_VS_DAY8_EFF_CD8_TCELL_DN                            | 200 | 1.878  | 0.00000      | 2.132     | 0.00000      | 2.095     | 0.00000      |           |
| TAG+TEFF_GOLDRATH_EFF_VS_MEMORY_CD8_TCELL_UP                             | 199 | 1.823  | 0.00000      | 2.074     | 0.00000      | 2.092     | 0.00000      |           |
| TAG+TEFF_KAECH_DAY8_EFF_VS_MEMORY_CD8_TCELL_UP                           | 200 | 1.796  | 0.00000      | 2.162     | 0.00000      | 2.064     | 0.00000      |           |
| TAG+TEFF_GOLDRATH_NAIVE_VS_EFF_CD8_TCELL_DN                              | 199 | 1.915  | 0.00000      | 2.097     | 0.00000      | 2.047     | 0.00000      |           |
| TAG+TEFF_GSE30962_PRIMARY_VS_SECONDARY_ACUTE_LCMV_INF_CD8_TCELL_UP       | 200 | 1.423  | 0.01815      | 2.144     | 0.00000      | 2.039     | 0.00000      |           |
| TAG+TEFF_KAECH_DAY8_EFF_VS_DAY15_EFF_CD8_TCELL_UP                        | 197 | 1.374  | 0.08498      | 2.088     | 0.00000      | 2.039     | 0.00000      |           |
| TAG+TEFF_GSE15930_NAIVE_VS_72H_IN_VITRO_STIM_CD8_TCELL_DN                | 198 | 1.508  | 0.00587      | 2.135     | 0.00000      | 2.035     | 0.00000      |           |
| TAG+TEFF_GSE15930_NAIVE_VS_72H_IN_VITRO_STIM_TRICHOSTATINA_CD8_TCELL_DN  | 197 | 1.455  | 0.00810      | 2.016     | 0.00000      | 2.027     | 0.00000      |           |
| TAG+TEFF_GSE10239_NAIVE_VS_DAY4.5_EFF_CD8_TCELL_DN                       | 200 | 1.530  | 0.00409      | 2.069     | 0.00000      | 2.022     | 0.00000      |           |
| TAG+TEFF_GSE10239_NAIVE_VS_KLRG1HIGH_EFF_CD8_TCELL_DN                    | 198 | 1.533  | 0.00202      | 2.019     | 0.00000      | 2.016     | 0.00000      |           |
| TAG+TEFF_GSE15930_NAIVE_VS_72H_IN_VITRO_STIM_IFNAB_CD8_TCELL_DN          | 199 | 1.438  | 0.01581      | 2.065     | 0.00000      | 2.009     | 0.00000      |           |
| TAG+TEFF_GSE15930_NAIVE_VS_24H_IN_VITRO_STIM_IL12_CD8_TCELL_DN           | 198 | 1.203  | 0.16024      | 1.895     | 0.00000      | 1.965     | 0.00000      |           |
| TAG+TEFF_GSE15930_NAIVE_VS_24H_IN_VITRO_STIM_CD8_TCELL_DN                | 198 | 1.089  | 0.28571      | 1.841     | 0.00000      | 1.924     | 0.00000      |           |
| TAG+TEFF_GSE15930_NAIVE_VS_24H_IN_VITRO_STIM_INFAB_CD8_TCELL_DN          | 198 | 1.228  | 0.11934      | 1.853     | 0.00000      | 1.909     | 0.00000      |           |
| TAG+TEFF_GSE15930_NAIVE_VS_48H_IN_VITRO_STIM_CD8_TCELL_DN                | 199 | 1.218  | 0.13772      | 1.919     | 0.00000      | 1.897     | 0.00000      |           |
| TAG+TEFF_GSE15930_NAIVE_VS_72H_IN_VITRO_STIM_IL12_CD8_TCELL_DN           | 198 | 1.788  | 0.00000      | 2.064     | 0.00000      | 1.790     | 0.00000      |           |
| TAG+TEFF_KAECH_NAIVE_VS_DAY15_EFF_CD8_TCELL_DN                           | 200 | 1.934  | 0.00000      | 2.063     | 0.00000      | 1.776     | 0.00210      |           |
| TAG+TEFF_GSE10239_MEMORY_VS_KLRG1INT_EFF_CD8_TCELL_DN                    | 200 | 1.382  | 0.01336      | 1.903     | 0.00000      | 1.736     | 0.00000      |           |
| TAG+TEFF_GSE10239_MEMORY_VS_KLRG1HIGH_EFF_CD8_TCELL_DN                   | 200 | 1.126  | 0.20958      | 1.893     | 0.00000      | 1.728     | 0.00000      |           |
| TAG+TEFF_GSE15930_NAIVE_VS_48H_IN_VITRO_STIM_IL12_CD8_TCELL_DN           | 200 | 1.227  | 0.13718      | 1.830     | 0.00000      | 1.706     | 0.00203      |           |
| TAG+TEFF_GSE19825_NAIVE_VS_DAY3_EFF_CD8_TCELL_DN                         | 199 | 1.520  | 0.00197      | 1.881     | 0.00000      | 1.687     | 0.00205      |           |
| TAG+TEFF_GSE10239_MEMORY_VS_DAY4.5_EFF_CD8_TCELL_DN                      | 198 | 1.082  | 0.31102      | 1.720     | 0.00000      | 1.528     | 0.01253      |           |
| TAG+TEFF_GSE19825_NAIVE_VS_IL2RAHIGH_DAY3_EFF_CD8_TCELL_DN               | 198 | 1.348  | 0.00588      | 1.656     | 0.00000      | 1.501     | 0.00412      |           |
| TAG+TEFF_GSE10239_KLRG1INT_VS_KLRG1HIGH_EFF_CD8_TCELL_DN                 | 195 | 1.350  | 0.06870      | 1.583     | 0.00199      | 1.410     | 0.01190      |           |
| TAG+TEFF_GSE26890_CXCR1_NEG_VS_POS_EFFECTOR_CD8_TCELL_DN                 | 200 | 1.544  | 0.00000      | 1.856     | 0.00000      | 1.261     | 0.06992      |           |
| TAG+TEFF_GSE19825_CD24LOW_VS_IL2RA_HIGH_DAY3_EFF_CD8_TCELL_DN            | 199 | 1.178  | 0.12621      | 1.303     | 0.03742      | 1.223     | 0.03839      |           |
| TCM SIGNATURE SETS                                                       |     | SIZE   | NES (N vs B) | NOM p-val | NES (T vs B) | NOM p-val | NES (T vs N) | NOM p-val |
| TAG+TCM_GSE16522_MEMORY_VS_NAIVE_CD8_TCELL_UP                            | 196 | 1.220  | 0.11200      | 1.512     | 0.00837      | 1.391     | 0.02469      |           |
| TAG+TCM_GSE23321_CENTRAL_VS_EFFECTOR_MEMORY_CD8_TCELL_UP                 | 198 | 1.309  | 0.09658      | 1.581     | 0.00821      | 1.340     | 0.05578      |           |
| TAG+TCM_GSE16522_ANTI_CD3CD28_STIM_VS_UNSTIM_MEMORY_CD8_TCELL_DN         | 198 | 1.322  | 0.05159      | 1.746     | 0.00000      | 1.275     | 0.05979      |           |
| TEM SIGNATURE SETS                                                       |     | SIZE   | NES (N vs B) | NOM p-val | NES (T vs B) | NOM p-val | NES (T vs N) | NOM p-val |
| TAG+TEM_GSE10239_NAIVE_VS_KLRG1INT_EFF_CD8_TCELL_DN                      | 198 | 1.626  | 0.00000      | 1.948     | 0.00000      | 1.726     | 0.00000      |           |
| TAG+TEM_GSE10239_KLRG1INT_VS_KLRG1HIGH_EFF_CD8_TCELL_UP                  | 197 | -1.305 | 0.07085      | 1.165     | 0.17547      | 1.518     | 0.00602      |           |
| TAG+TEM_GSE19825_CD24LOW_VS_IL2RA_HIGH_DAY3_EFF_CD8_TCELL_UP             | 199 | 1.292  | 0.03448      | 1.574     | 0.00000      | 1.413     | 0.00998      |           |
| TAG+TEM_GSE16522_MEMORY_VS_NAIVE_CD8_TCELL_UP                            | 196 | 1.220  | 0.11200      | 1.512     | 0.00837      | 1.391     | 0.02469      |           |
| TAG+TEM_GSE10239_NAIVE_VS_MEMORY_CD8_TCELL_DN                            | 189 | 1.557  | 0.00000      | 1.821     | 0.00000      | 1.370     | 0.03462      |           |
| TAG+TEM_GOLDRATH_NAIVE_VS_MEMORY_CD8_TCELL_DN                            | 200 | 1.825  | 0.00000      | 1.973     | 0.00000      | 1.290     | 0.04858      |           |
| TAG+TEM_GSE16522_ANTI_CD3CD28_STIM_VS_UNSTIM_MEMORY_CD8_TCELL_DN         | 198 | 1.322  | 0.05159      | 1.746     | 0.00000      | 1.275     | 0.05979      |           |
| TAG+TEM_GSE41978_KLRG1_HIGH_VS_LOW_EFFECTOR_CD8_TCELL_DN                 | 156 | 1.490  | 0.00387      | 1.736     | 0.00000      | 1.245     | 0.10693      |           |
| TRM SIGNATURE SETS                                                       |     | SIZE   | NES (N vs B) | NOM p-val | NES (T vs B) | NOM p-val | NES (T vs N) | NOM p-val |
| TAG+TRM_GSE39152_BRAIN_VS_SPLEEN_CD103_NEG_MEMORY_CD8_TCELL_UP           | 199 | 1.231  | 0.11811      | 1.559     | 0.01016      | 1.076     | 0.30140      |           |
| TAG+TRM_GSE39152_CD103_NEG_VS_POS_MEMORY_CD8_TCELL_DN                    | 199 | 1.479  | 0.00594      | 1.496     | 0.00609      | 1.018     | 0.40365      |           |
| TAG+TRM_GSE39152_SPLEEN_CD103_NEG_VS_BRAIN_CD103_POS_MEMORY_CD8_TCELL_DN | 195 | 0.967  | 0.56238      | 1.073     | 0.28947      | -0.974    | 0.52333      |           |

### Supplementary Figure 2 | Gene signatures tested for CD8<sup>+</sup> TILs.

Canonical T cell signatures ( $T_{EFF}$ ,  $T_{EM}$ ,  $T_{CM}$ , and  $T_{RM}$ ) tested for enrichment in CD8<sup>+</sup> T cells isolated from normal appearing brain (N) vs blood (B), tumor (T) vs blood (B), and tumor (T) vs normal appearing brain (N). Gene set enrichment analysis (1).

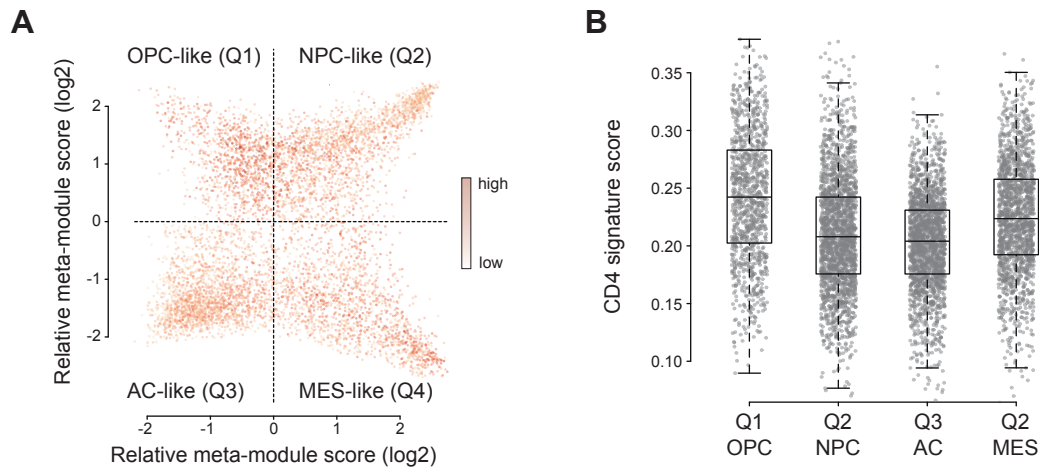

**Supplementary Figure 3 | Representation of the tumor site specific CD4<sup>+</sup> T cell signature in GBM cellular states (2).**

(A) The presence of our GBM specific CD4<sup>+</sup> T cell signature as defined by the DEGs of CD4<sup>+</sup> T cells in GBM vs normal appearing brain was assessed in the compiled single cell transcriptomes of 28 GBM cases arranged in a meta-module score matrix according to (2). (B) Numerical scores of our GBM specific CD4<sup>+</sup> T cell signature in each quadrant of the meta-module score matrix representing oligodendrocytic precursor (OPC)-like, neural progenitor cell (NPC)-like, astrocyte (AC)-like, and mesenchymal (MES)-like GBM states, respectively. For details see Materials and Methods.

**Supplementary Table 1. Clinical features of GBM cases**

| Case  | Age (yrs) | Gender | Molecular pathology | Localization       | First symptom         |
|-------|-----------|--------|---------------------|--------------------|-----------------------|
| GBM 1 | 55        | male   | MGMT non-methylated | fronto-lateral     | epileptic seizure     |
| GBM 2 | 57        | male   | MGMT non-methylated | insular            | hemiparesis           |
| GBM 3 | 33        | female | MGMT methylated     | temporo-occipital  | lightheadedness       |
| GBM 4 | 62        | male   | MGMT methylated     | occipital          | hemianopia            |
| GBM 5 | 47        | male   | MGMT methylated     | frontal            | headache              |
| GBM 6 | 82        | female | MGMT non-methylated | occipital          | visual field deficits |
| GBM 7 | 52        | male   | MGMT methylated     | temporal           | paresis of leg        |
| GBM 8 | 53        | male   | MGMT non-methylated | callosal (frontal) | personality change    |
| GBM 9 | 62        | female | MGMT non-methylated | fronto-temporal    | epileptic seizure     |

All cases were IDH<sup>wt</sup> and were confirmed as GBM by histology.

**Supplementary Table 1 | Clinical features of GBM cases.** Demographic characteristics of the nine GBM cases included in the study. All cases were IDH<sup>wt</sup> and histology confirmed GBM patients. All patients were treatment naive and had not been irradiated at the time of sampling.

**Supplementary Table 2. Clinical features of GBM validation cases**

| Case   | Age (yrs) | Gender | Molecular pathology | Localization    | First symptom           |
|--------|-----------|--------|---------------------|-----------------|-------------------------|
| GBM 10 | 84        | male   | MGMT methylated     | insular         | aphasia and hemiparesis |
| GBM 11 | 48        | male   | MGMT non-methylated | parietal        | epileptic seizure       |
| GBM 12 | 50        | male   | MGMT non-methylated | temporal        | epileptic seizure       |
| GBM 13 | 72        | female | N.D.                | fronto-parietal | epileptic seizure       |

All cases were IDH<sup>wt</sup> and were confirmed as GBM by histology. N.D., not determined.

**Supplementary Table 2 | Clinical features of GBM validation cases.** Demographic characteristics of four GBM cases included in the study to validate marker expression of CD4<sup>+</sup> T cells in blood, normal appearing brain and at the GBM site by flow cytometry. All cases were IDH<sup>wt</sup> and histology confirmed GBM patients. All patients were treatment naive and had not been irradiated at the time of sampling.

## **Legends to Datasets S1 and S2**

**Dataset S1 | List of DEGs overlapping in our data set as compared to the BrainTIME data set (3) - Core signatures.** The DEG lists are given both for CD4<sup>+</sup> T cells as well as for CD8<sup>+</sup> T cells. DEGs refer to differential expression of genes in T cells isolated from the tumor bed as compared to the peripheral blood.

**Dataset S2 | List of core CD4<sup>+</sup> and CD8<sup>+</sup> TIL genes that were at the same time also differentially expressed between T cells isolated from the tumor bed as compared to T cells isolated from normal appearing brain tissue.** Intersection of the CD4<sup>+</sup> and CD8<sup>+</sup> core TIL signatures (see Dataset S1) and the DEGs in tumor vs normal appearing brain tissue from our data set (TUM).



## SI References

1. A. Subramanian *et al.*, Gene set enrichment analysis: a knowledge-based approach for interpreting genome-wide expression profiles. *Proc Natl Acad Sci U S A* **102**, 15545-15550 (2005).
2. C. Neftel *et al.*, An Integrative Model of Cellular States, Plasticity, and Genetics for Glioblastoma. *Cell* **178**, 835-849 e821 (2019).
3. F. Klemm *et al.*, Interrogation of the Microenvironmental Landscape in Brain Tumors Reveals Disease-Specific Alterations of Immune Cells. *Cell* **181**, 1643-1660 e1617 (2020).
